# Supplementary material for: Neutrophil to Lymphocyte Ratio in Oropharyngeal Squamous Cell Carcinoma: A Systematic Review and Meta-Analysis
Source: MDPI journal article supplement (doi:10.3390/cancers15030802), 2023-01-28
Supplement: s1 [file s1]

# Supplementary Materials: Neutrophil to Lymphocyte Ratio in Oropharyngeal Squamous Cell Carcinoma: A Systematic Review and Meta-Analysis

Juan P. Rodrigo, Mario Sánchez-Canteli, Asterios Triantafyllou, Remco de Bree, Antti A. Mäkitie, Alessandro Franchi, Henrik Hellquist, Nabil F. Saba, Göran Stenman, Robert P. Takes, Cristina Valero, Nina Zidar and Alfio Ferlito

**Table S1.** Search strategy in PubMed.

|                                                                                                                                                                                                                                                                                                                                                                                                                                                                                                                                                                                                                                                                                                                                                                                                                                                                                                                                                                                                                                                                                                                                                                                                                                                                                                                                                                                                                                                                                                                                                                                                                                                                                                                                                                                                                                                                                                                                                                                                                  |
|------------------------------------------------------------------------------------------------------------------------------------------------------------------------------------------------------------------------------------------------------------------------------------------------------------------------------------------------------------------------------------------------------------------------------------------------------------------------------------------------------------------------------------------------------------------------------------------------------------------------------------------------------------------------------------------------------------------------------------------------------------------------------------------------------------------------------------------------------------------------------------------------------------------------------------------------------------------------------------------------------------------------------------------------------------------------------------------------------------------------------------------------------------------------------------------------------------------------------------------------------------------------------------------------------------------------------------------------------------------------------------------------------------------------------------------------------------------------------------------------------------------------------------------------------------------------------------------------------------------------------------------------------------------------------------------------------------------------------------------------------------------------------------------------------------------------------------------------------------------------------------------------------------------------------------------------------------------------------------------------------------------|
| Search:                                                                                                                                                                                                                                                                                                                                                                                                                                                                                                                                                                                                                                                                                                                                                                                                                                                                                                                                                                                                                                                                                                                                                                                                                                                                                                                                                                                                                                                                                                                                                                                                                                                                                                                                                                                                                                                                                                                                                                                                          |
| (neutrophil lymphocyte ratio AND (((head and neck squamous cell carcinoma) OR (head and neck cancer) OR (oropharyngeal squamous cell carcinoma) OR (oropharynx cancer)))) Sort by: Most Recent                                                                                                                                                                                                                                                                                                                                                                                                                                                                                                                                                                                                                                                                                                                                                                                                                                                                                                                                                                                                                                                                                                                                                                                                                                                                                                                                                                                                                                                                                                                                                                                                                                                                                                                                                                                                                   |
| ("neutrophil s"[All Fields] OR "neutrophils"[All Fields] OR "neutrophilic"[All Fields] OR "neutrophilic"[All Fields] OR "neutrophils"[MeSH Terms] OR "neutrophils"[All Fields] OR "neutrophil"[All Fields] OR "neutrophile"[All Fields]) AND ("lymphocytes"[MeSH Terms] OR "lymphocytes"[All Fields] OR "lymphocyte count"[MeSH Terms] OR ("lymphocyte"[All Fields] AND "count"[All Fields]) OR "lymphocyte count"[All Fields] OR "lymphocyte"[All Fields] OR "lymphocytic"[All Fields] OR "lymphocytes"[All Fields]) AND ("ratio"[All Fields] OR "ratio s"[All Fields] OR "ratios"[All Fields] OR "ratios"[All Fields]) AND ("squamous cell carcinoma of head and neck"[MeSH Terms] OR ("squamous"[All Fields] AND "cell"[All Fields] AND "carcinoma"[All Fields] AND "head"[All Fields] AND "neck"[All Fields]) OR "squamous cell carcinoma of head and neck"[All Fields] OR ("head"[All Fields] AND "neck"[All Fields] AND "squamous"[All Fields] AND "cell"[All Fields] AND "carcinoma"[All Fields]) OR "head and neck squamous cell carcinoma"[All Fields] OR ("head and neck neoplasms"[MeSH Terms] OR ("head"[All Fields] AND "neck"[All Fields] AND "neoplasms"[All Fields]) OR "head and neck neoplasms"[All Fields] OR ("head"[All Fields] AND "neck"[All Fields] AND "cancer"[All Fields]) OR "head and neck cancer"[All Fields]) OR ("squamous cell carcinoma of head and neck"[MeSH Terms] OR ("squamous"[All Fields] AND "cell"[All Fields] AND "carcinoma"[All Fields] AND "head"[All Fields] AND "neck"[All Fields]) OR "squamous cell carcinoma of head and neck"[All Fields] OR ("oropharyngeal"[All Fields] AND "squamous"[All Fields] AND "cell"[All Fields] AND "carcinoma"[All Fields]) OR "oropharyngeal squamous cell carcinoma"[All Fields] OR ("oropharyngeal neoplasms"[MeSH Terms] OR ("oropharyngeal"[All Fields] AND "neoplasms"[All Fields]) OR "oropharyngeal neoplasms"[All Fields] OR ("oropharynx"[All Fields] AND "cancer"[All Fields]) OR "oropharynx cancer"[All Fields])) |
| Translations                                                                                                                                                                                                                                                                                                                                                                                                                                                                                                                                                                                                                                                                                                                                                                                                                                                                                                                                                                                                                                                                                                                                                                                                                                                                                                                                                                                                                                                                                                                                                                                                                                                                                                                                                                                                                                                                                                                                                                                                     |
| neutrophil: "neutrophil's"[All Fields] OR "neutrophils"[All Fields] OR "neutrophilic"[All Fields] OR "neutrophilic"[All Fields] OR "neutrophils"[MeSH Terms] OR "neutrophils"[All Fields] OR "neutrophil"[All Fields] OR "neutrophile"[All Fields]                                                                                                                                                                                                                                                                                                                                                                                                                                                                                                                                                                                                                                                                                                                                                                                                                                                                                                                                                                                                                                                                                                                                                                                                                                                                                                                                                                                                                                                                                                                                                                                                                                                                                                                                                               |
| lymphocyte: "lymphocytes"[MeSH Terms] OR "lymphocytes"[All Fields] OR "lymphocyte count"[MeSH Terms] OR ("lymphocyte"[All Fields] AND "count"[All Fields]) OR "lymphocyte count"[All Fields] OR "lymphocyte"[All Fields] OR "lymphocytic"[All Fields] OR "lymphocytic"[All Fields]                                                                                                                                                                                                                                                                                                                                                                                                                                                                                                                                                                                                                                                                                                                                                                                                                                                                                                                                                                                                                                                                                                                                                                                                                                                                                                                                                                                                                                                                                                                                                                                                                                                                                                                               |
| ratio: "ratio"[All Fields] OR "ratio's"[All Fields] OR "ratios"[All Fields] OR "ratios"[All Fields]                                                                                                                                                                                                                                                                                                                                                                                                                                                                                                                                                                                                                                                                                                                                                                                                                                                                                                                                                                                                                                                                                                                                                                                                                                                                                                                                                                                                                                                                                                                                                                                                                                                                                                                                                                                                                                                                                                              |
| head and neck squamous cell carcinoma: "squamous cell carcinoma of head and neck"[MeSH Terms] OR ("squamous"[All Fields] AND "cell"[All Fields] AND "carcinoma"[All Fields] AND "head"[All Fields] AND "neck"[All Fields]) OR "squamous cell carcinoma of head and neck"[All Fields] OR ("head"[All Fields] AND "neck"[All Fields] AND "squamous"[All Fields] AND "cell"[All Fields] AND "carcinoma"[All Fields]) OR "head and neck squamous cell carcinoma"[All Fields]                                                                                                                                                                                                                                                                                                                                                                                                                                                                                                                                                                                                                                                                                                                                                                                                                                                                                                                                                                                                                                                                                                                                                                                                                                                                                                                                                                                                                                                                                                                                         |
| head and neck cancer: "head and neck neoplasms"[MeSH Terms] OR ("head"[All Fields] AND "neck"[All Fields] AND "neoplasms"[All Fields]) OR "head and neck neoplasms"[All Fields] OR ("head"[All Fields] AND "neck"[All Fields] AND "cancer"[All Fields]) OR "head and neck cancer"[All Fields]                                                                                                                                                                                                                                                                                                                                                                                                                                                                                                                                                                                                                                                                                                                                                                                                                                                                                                                                                                                                                                                                                                                                                                                                                                                                                                                                                                                                                                                                                                                                                                                                                                                                                                                    |
| oropharyngeal squamous cell carcinoma: "squamous cell carcinoma of head and neck"[MeSH Terms] OR ("squamous"[All Fields] AND "cell"[All Fields] AND "carcinoma"[All Fields] AND "head"[All Fields] AND "neck"[All Fields]) OR "squamous cell carcinoma of head and neck"[All Fields] OR ("oropharyngeal"[All Fields] AND "squamous"[All Fields] AND "cell"[All Fields] AND "carcinoma"[All Fields]) OR "oropharyngeal squamous cell carcinoma"[All Fields]                                                                                                                                                                                                                                                                                                                                                                                                                                                                                                                                                                                                                                                                                                                                                                                                                                                                                                                                                                                                                                                                                                                                                                                                                                                                                                                                                                                                                                                                                                                                                       |
| oropharynx cancer: "oropharyngeal neoplasms"[MeSH Terms] OR ("oropharyngeal"[All Fields] AND "neoplasms"[All Fields]) OR "oropharyngeal neoplasms"[All Fields] OR ("oropharynx"[All Fields] AND "cancer"[All Fields]) OR "oropharynx cancer"[All Fields]                                                                                                                                                                                                                                                                                                                                                                                                                                                                                                                                                                                                                                                                                                                                                                                                                                                                                                                                                                                                                                                                                                                                                                                                                                                                                                                                                                                                                                                                                                                                                                                                                                                                                                                                                         |
| Results                                                                                                                                                                                                                                                                                                                                                                                                                                                                                                                                                                                                                                                                                                                                                                                                                                                                                                                                                                                                                                                                                                                                                                                                                                                                                                                                                                                                                                                                                                                                                                                                                                                                                                                                                                                                                                                                                                                                                                                                          |
| <i>n</i> = 492                                                                                                                                                                                                                                                                                                                                                                                                                                                                                                                                                                                                                                                                                                                                                                                                                                                                                                                                                                                                                                                                                                                                                                                                                                                                                                                                                                                                                                                                                                                                                                                                                                                                                                                                                                                                                                                                                                                                                                                                   |

**Table S2.** The Newcastle-Ottawa Scale (NOS) for assessing the quality of studies in meta-analyses.

| References              | Selection                                |                                     |                           | Comparability                                                                |                                                                 | Exposure              |                                                 | Total Quality score              |
|-------------------------|------------------------------------------|-------------------------------------|---------------------------|------------------------------------------------------------------------------|-----------------------------------------------------------------|-----------------------|-------------------------------------------------|----------------------------------|
|                         | Representativeness of the exposed cohort | Selection of the non-exposed cohort | Ascertainment of exposure | Demonstration that outcome of interest was not present at the start of study | Comparability of cohorts on the basis of the design or analysis | Assessment of outcome | Was follow-up long enough for outcomes to occur | Adequacy of follow-up of cohorts |
| Ferrandino et al. [13]  | 1                                        | 1                                   | 1                         | 1                                                                            | 2                                                               | 1                     | 1                                               | 1                                |
| So et al. [14]          | 1                                        | 1                                   | 1                         | 1                                                                            | 1                                                               | 1                     | 1                                               | 1                                |
| De Felice et al. [15]   | 1                                        | 1                                   | 1                         | 1                                                                            | 2                                                               | 1                     | 1                                               | 1                                |
| Lin et al. [16]         | 1                                        | 1                                   | 1                         | 1                                                                            | 2                                                               | 1                     | 0                                               | 1                                |
| Kreinbrink et al. [17]  | 1                                        | 1                                   | 1                         | 1                                                                            | 2                                                               | 1                     | 0                                               | 1                                |
| Lin et al. [18]         | 1                                        | 1                                   | 1                         | 1                                                                            | 2                                                               | 1                     | 1                                               | 1                                |
| Cho et al. [19]         | 1                                        | 1                                   | 1                         | 1                                                                            | 2                                                               | 1                     | 1                                               | 1                                |
| Brewczyński et al. [20] | 1                                        | 1                                   | 1                         | 1                                                                            | 2                                                               | 1                     | 1                                               | 1                                |
| Staniewska et al. [21]  | 1                                        | 1                                   | 1                         | 1                                                                            | 1                                                               | 1                     | 0                                               | 1                                |
| Young et al. [22]       | 1                                        | 1                                   | 1                         | 1                                                                            | 1                                                               | 1                     | 0                                               | 1                                |
| Charles et al. [23]     | 1                                        | 1                                   | 1                         | 1                                                                            | 2                                                               | 1                     | 0                                               | 1                                |
| Panje et al. [24]       | 1                                        | 1                                   | 1                         | 1                                                                            | 2                                                               | 1                     | 1                                               | 1                                |
| Gorphe et al. [25]      | 1                                        | 1                                   | 1                         | 1                                                                            | 1                                                               | 1                     | 0                                               | 1                                |
| Ng et al. [26]          | 1                                        | 1                                   | 1                         | 1                                                                            | 2                                                               | 1                     | 1                                               | 1                                |

**Table S3.** Key findings of the selected studies.

| References              | Key Findings                                                                                                                                                                                |
|-------------------------|---------------------------------------------------------------------------------------------------------------------------------------------------------------------------------------------|
| Ferrandino et al. [13]  | Elevated NLR in HNSCC confers a poor prognosis.                                                                                                                                             |
| So et al. [14]          | Elevated pretreatment NLR was associated with poor DFS in patients with HPV +OPC                                                                                                            |
| De Felice et al. [15]   | N/L could play an important role in non-HPV-related oropharyngeal cancer progression and indicate prognosis.                                                                                |
| Lin et al. [16]         | Lymphopenia and NLR as early as 3 months after treatment start may serve as biomarkers of clinical outcomes in patients with HPV-negative OPC.                                              |
| Kreinbrink et al. [17]  | In a cohort of HPV + OPSCC patients, increasing absolute lymphocyte count is associated with improved OS and PFS                                                                            |
| Lin et al. [18]         | In exploratory analyses, elevated post-treatment NLR was associated with risk for distant metastases and death                                                                              |
| Cho et al. [19]         | Head and neck cancer tends to be more aggressive in patients with a high NLR, leading to a poorer outcome after radiotherapy.                                                               |
| Brewczyński et al. [20] | A higher pre-treatment NLR and SII were significant poor prognostic factors for both OS and DFS in the HPV+ group. These associations were not apparent in HPV- patients.                   |
| Staniewska et al. [21]  | In the study, only NLR proved to be an independent predictor of OS. However, its clinical value is limited due to the relatively low sensitivity and specificity.                           |
| Young et al. [22]       | The NLR is an independent prognostic factor for locoregional control in oropharyngeal cancer treated with chemoradiotherapy.                                                                |
| Charles et al. [23]     | The results show patients with NLR > 5 predict for shorter overall survival                                                                                                                 |
| Panje et al. [24]       | The NLR remains an independent prognostic factor for patients with OC undergoing radiotherapy independent of the tumor volume.                                                              |
| Gorphe et al. [25]      | We found hemoglobin level and the NLR to be independent prognostic factors in p16-positive OPSCC patients.                                                                                  |
| Ng et al. [26]          | Pre-radiotherapy NLR is an independent prognostic factor in patients with oropharyngeal cancer regardless of HPV status. Patients with lower NLR had more favorable OS and disease control. |

NLR: neutrophil-to-lymphocyte ratio; SII: systemic inflammatory index; OS: Overall survival; DFS: Disease-free survival; RFS: Recurrence-free survival; PFS: Progression-free survival.

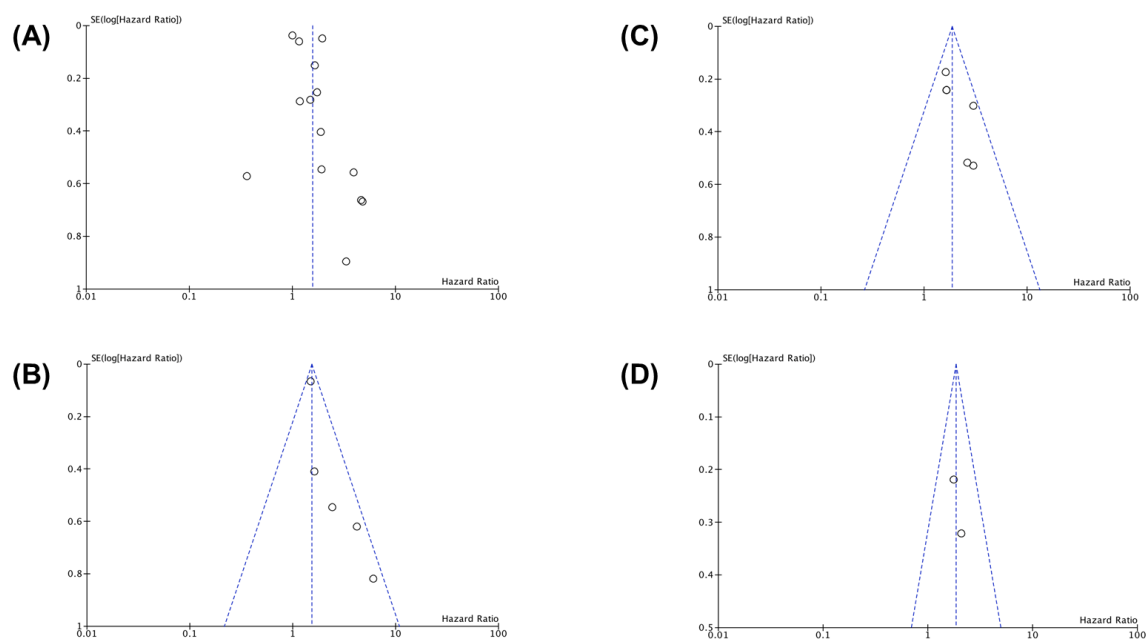

**Figure S1.** Funnel plots of impact of NLR in “all patients” on overall (A), disease-free survival (B), recurrence-free survival (C) and locoregional control (D).

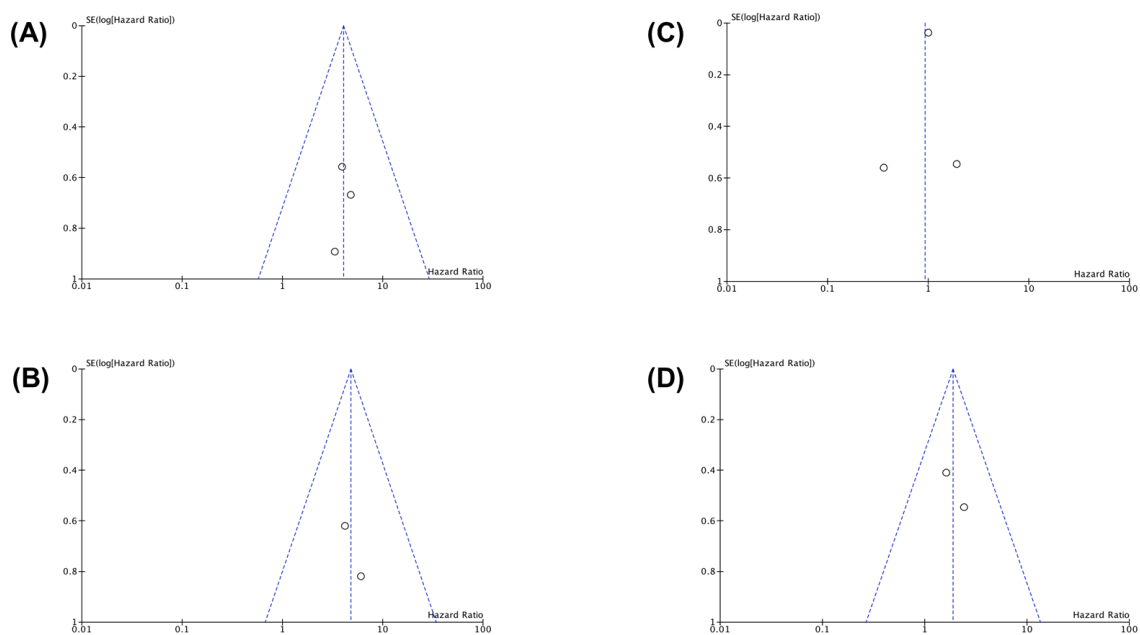

**Figure S2.** Funnel plots of impact of NLR in “HPV+ patients” on overall survival (A) and disease-free survival (B) and in “HPV- patients” on overall survival (C) and on overall survival (D).

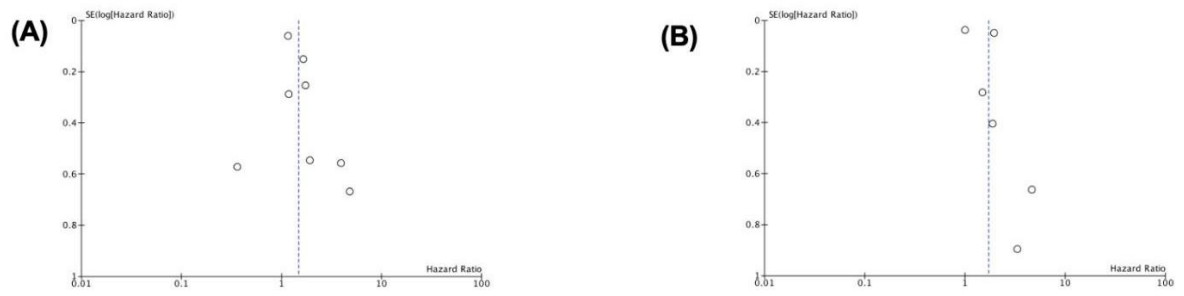

**Figure S3.** Funnel plots of impact of NLR in “all patients” on overall survival with (A) R or CR treatment and (B) mixed primary treatment.

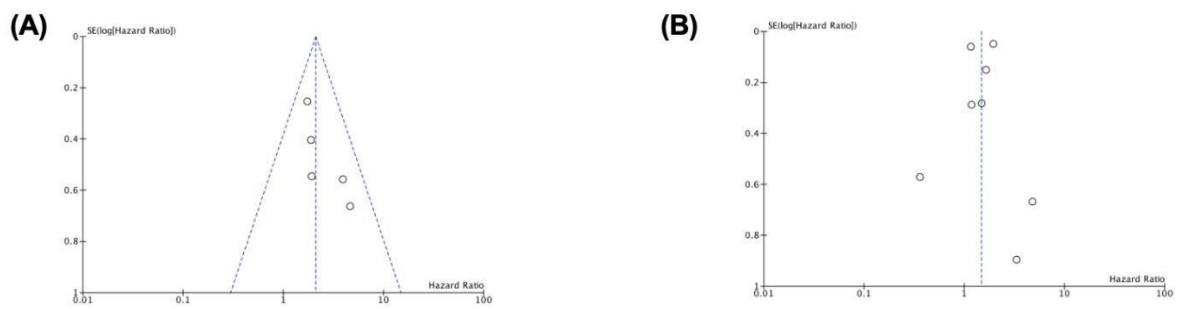

**Figure S4.** Funnel plots of impact by cut-off value of NLR in “all patients” (A) NLR  $\geq 3.6$  (B)  $< 3.6$ .
